# Supplementary material for: Why do GCMs overestimate the aerosol cloud lifetime effect? A comparison of CAM5 and a CRM
Source: Copernicus journal article supplement (doi:10.5194/acp-2016-612), 2016-07-21
Supplement: Supplementary file 1 [file acp-2016-612-supplement.pdf]

# Why do GCMs overestimate the aerosol cloud lifetime effect? A comparison of CAM5 and a CRM

Contents of this file:

- Figures S1,S2,S3

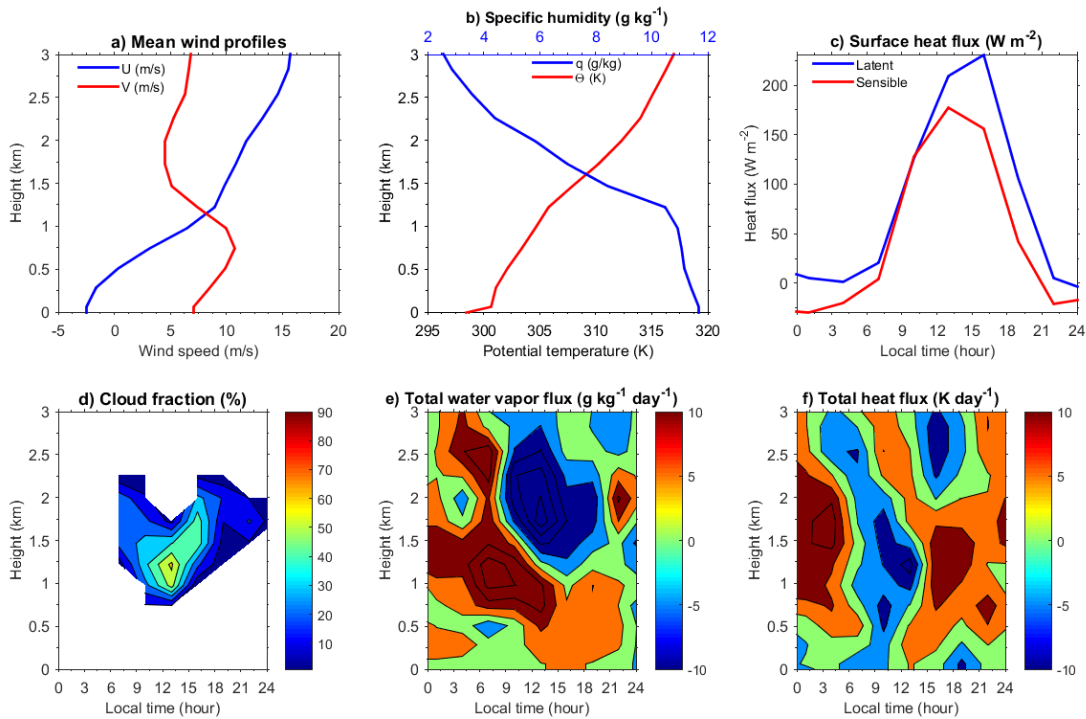

**Figure S1.** (a) Mean observed wind profiles from 10:00-19:00 (local time) on May 27<sup>th</sup>, 2011. (b) Mean observed potential temperature and specific humidity profiles from 10:00-19:00 (local time) on May 27<sup>th</sup>, 2011. (c) Observed surface latent and sensible heat fluxes. (d) Observed cloud fractions. (e) Total advected (horizontal+vertical) water vapor flux and (f) heat flux from the objective variational analysis (Xie *et al.* 2014).

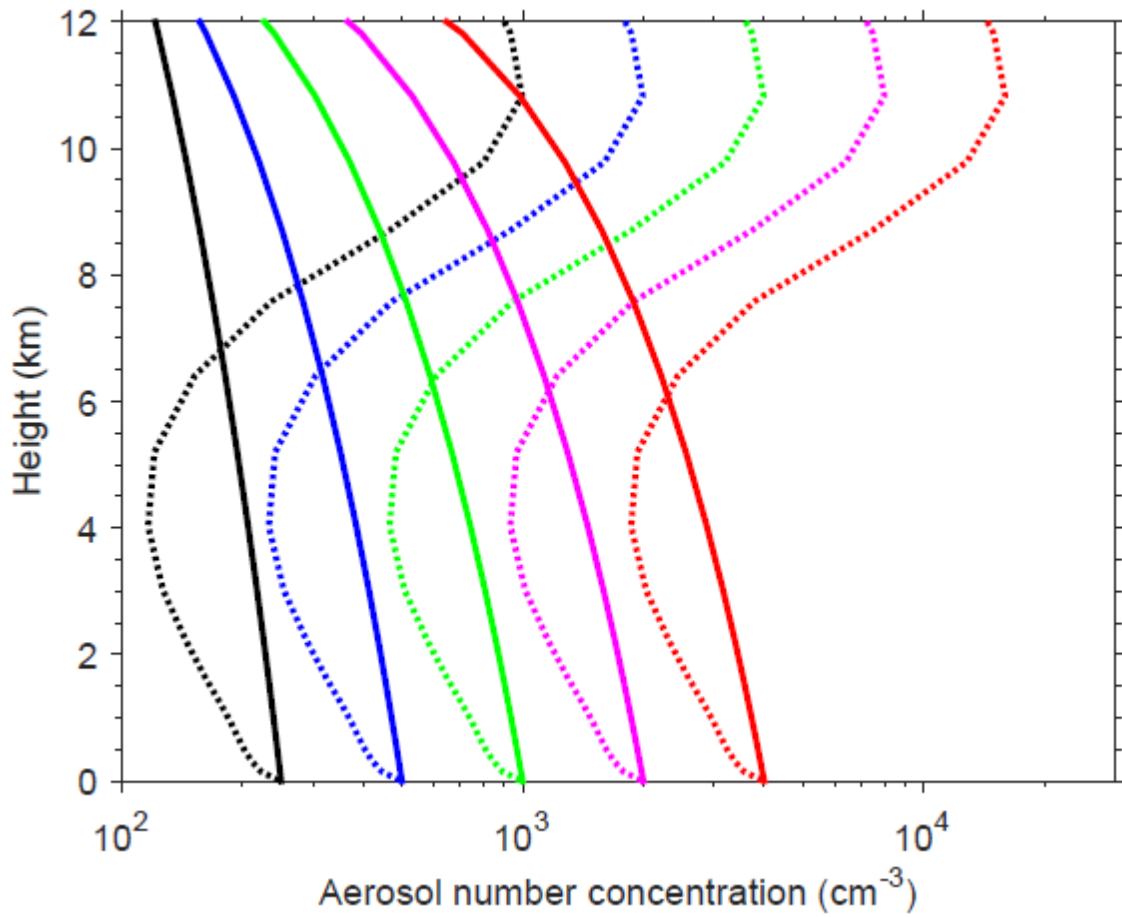

**Figure S2.** Profiles of aerosol number concentration used in the CRM (solid) and CAM (dotted) with five different surface number concentrations ( $250 \text{ cm}^{-3}$ ,  $500 \text{ cm}^{-3}$ ,  $1000 \text{ cm}^{-3}$ ,  $2000 \text{ cm}^{-3}$  and  $4000 \text{ cm}^{-3}$ ).

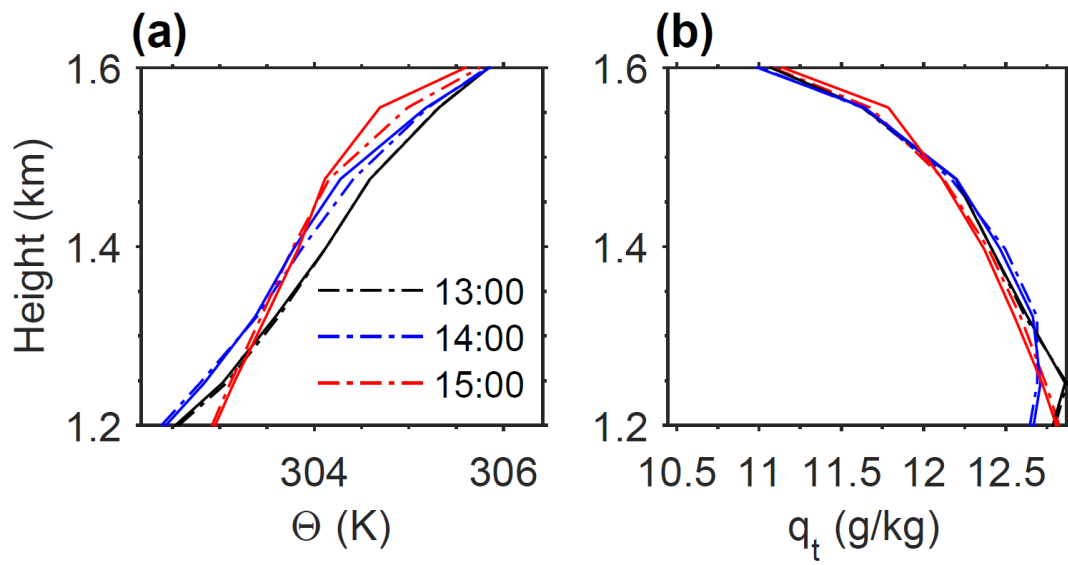

**Figure S3.** An enlarged portion of Fig 2a and 2b showing the (a) domain averaged potential temperatures ( $\theta$ ) and (b) total water specific humidity ( $q_t$ ).

**References are listed in the manuscript.**
